# Supplementary material
Source: publisher site journal article supplement (https://www.dovepress.com/article/472086)
Supplement: Supplementary file 1 [file get_supplementary_file.php]

**Supplementary material**

**Metabolic reprogramming of CD4+ T cells by mesenchymal stem cell-derived extracellular vesicles attenuates autoimmune hepatitis through mitochondrial protein transfer**


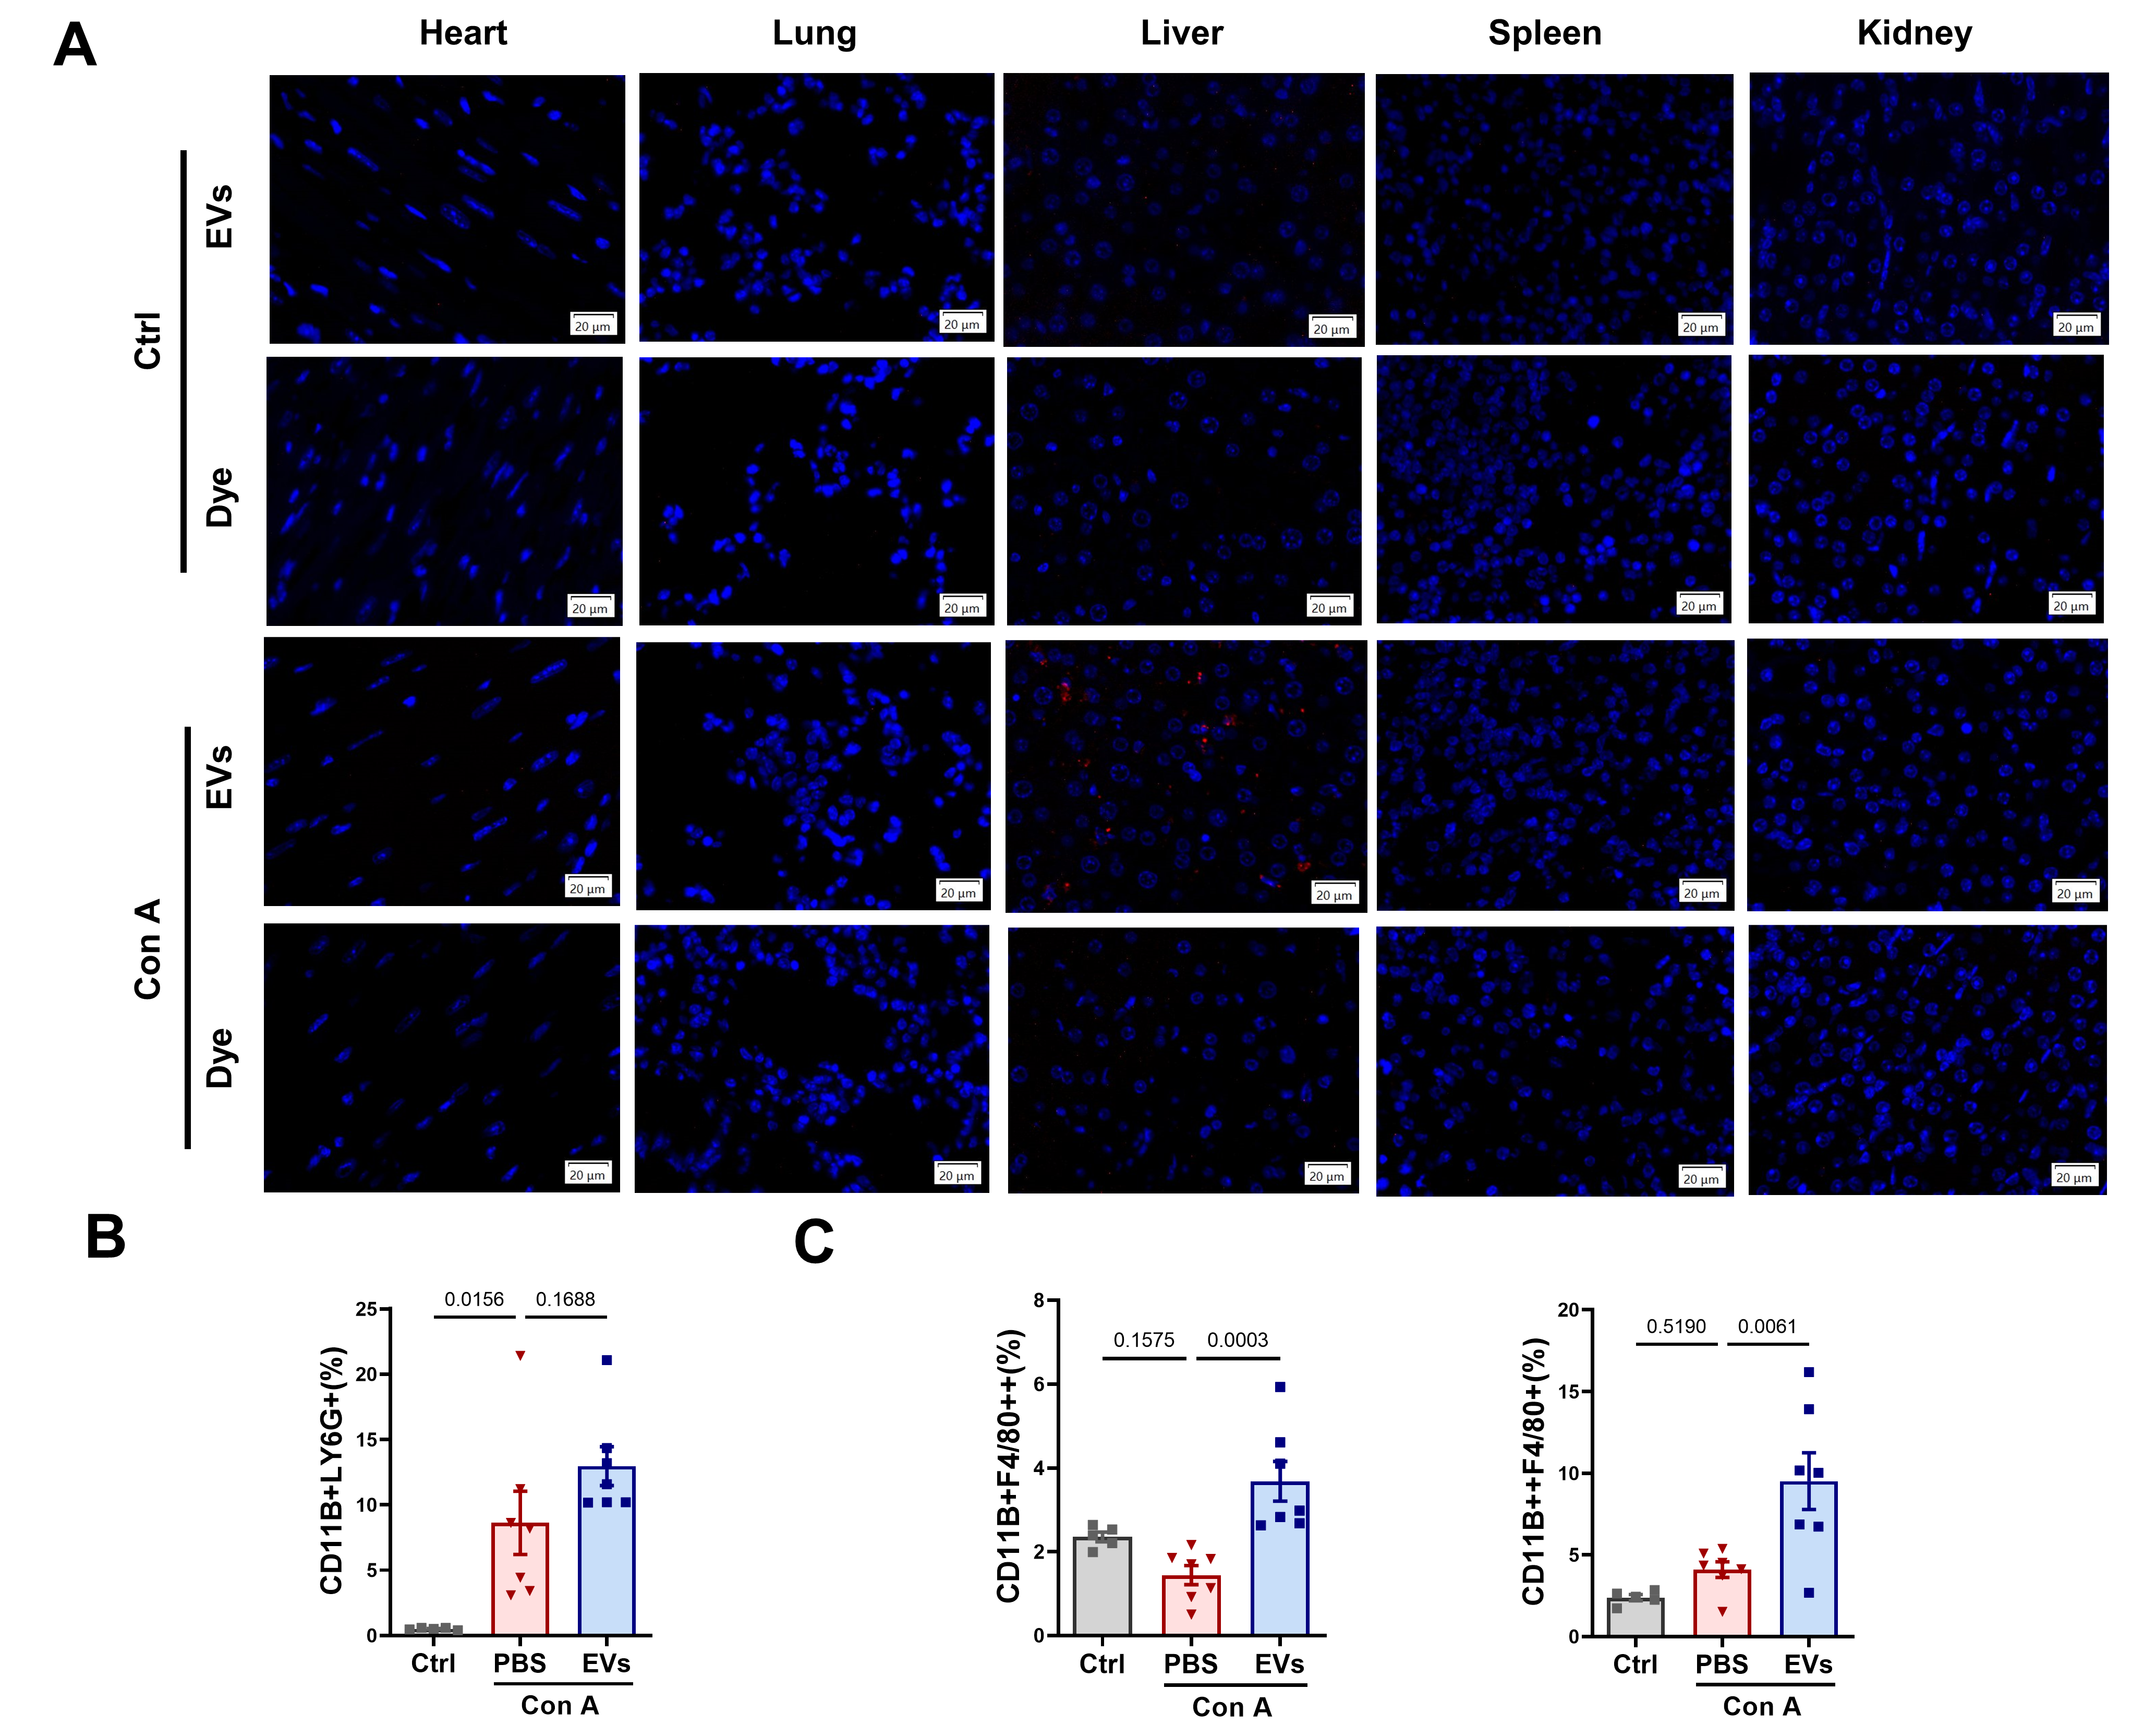


Figure S1A Representative fluorescence images of tissue sections from different organs of mice.

Figure S1B Statistical flow cytometry analysis of CD11B+LY6G+ cells in MNCs from different mouse livers.

Figure S1C Statistical flow cytometry analysis of CD11B+F4/80+ cells in MNCs from different mouse livers.

**Abbreviations:** EVs, extracellular vesicles.


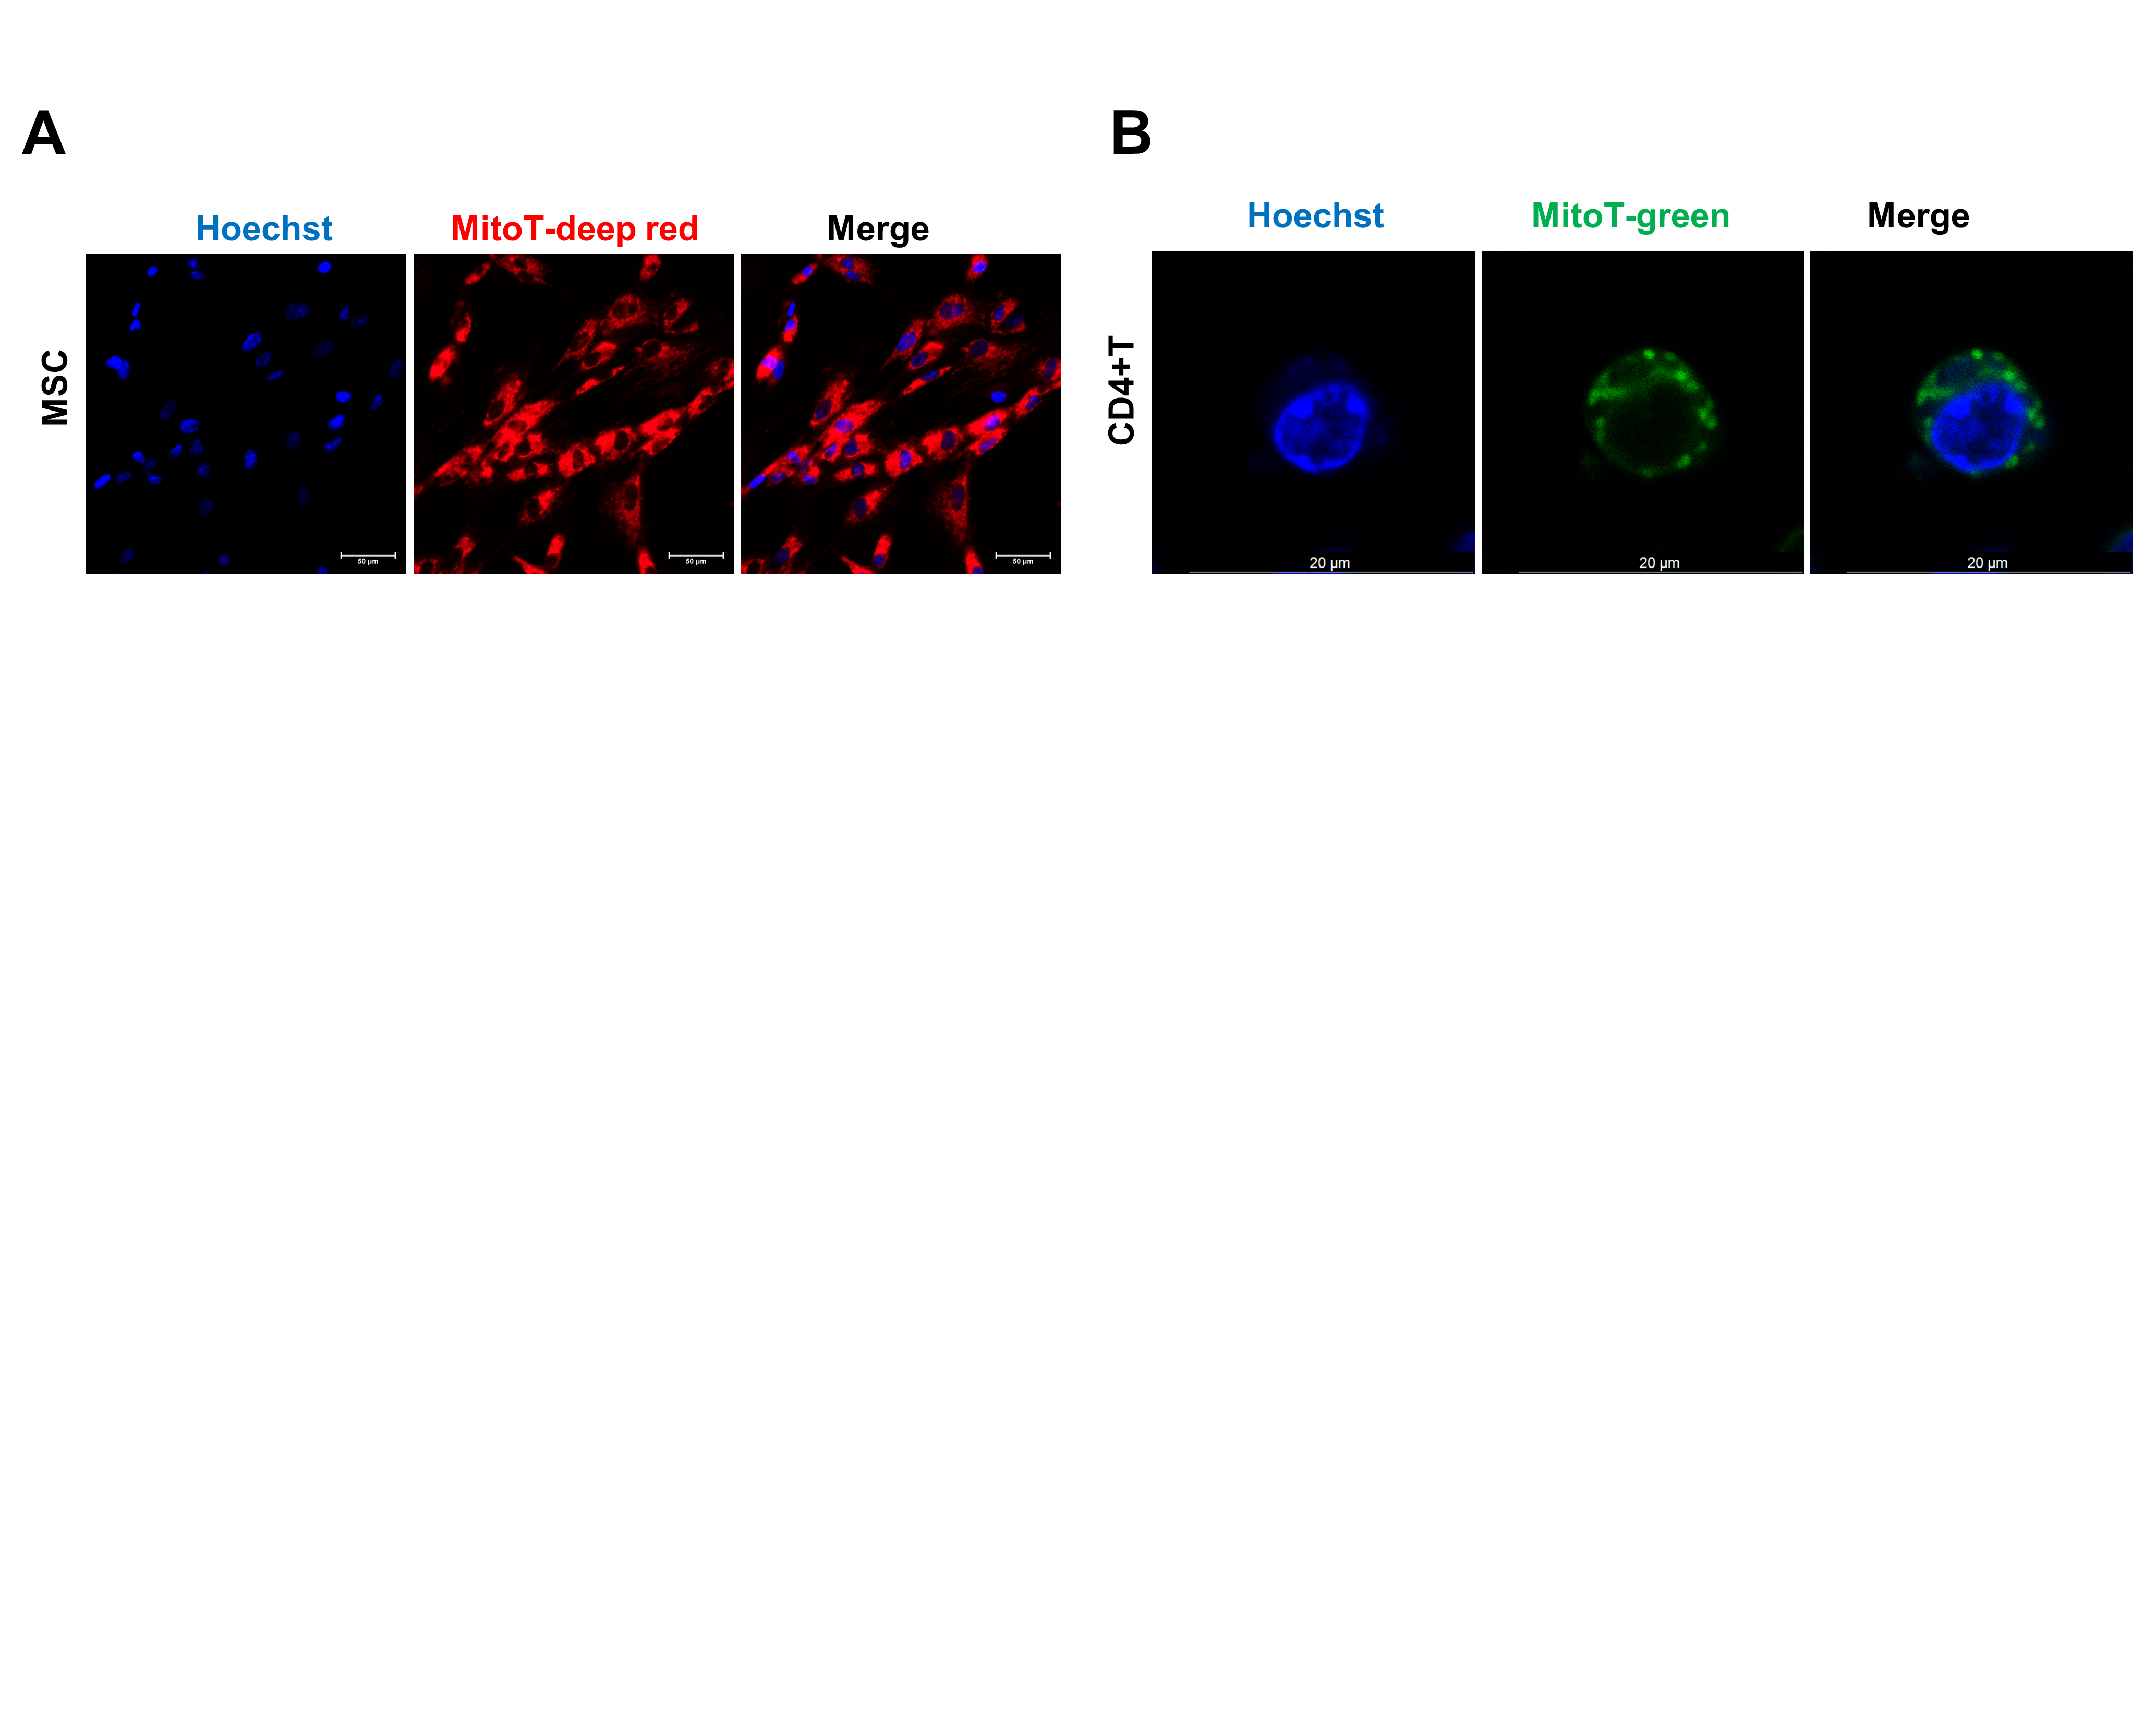


Figure S2A MitoTracker Deep Red-stained MSCs.

Figure S2B MitoTracker Green-labeled CD4+ T cells.

**Abbreviations:** MSCs, mesenchymal stem cells; MitoT, MitoTracker.


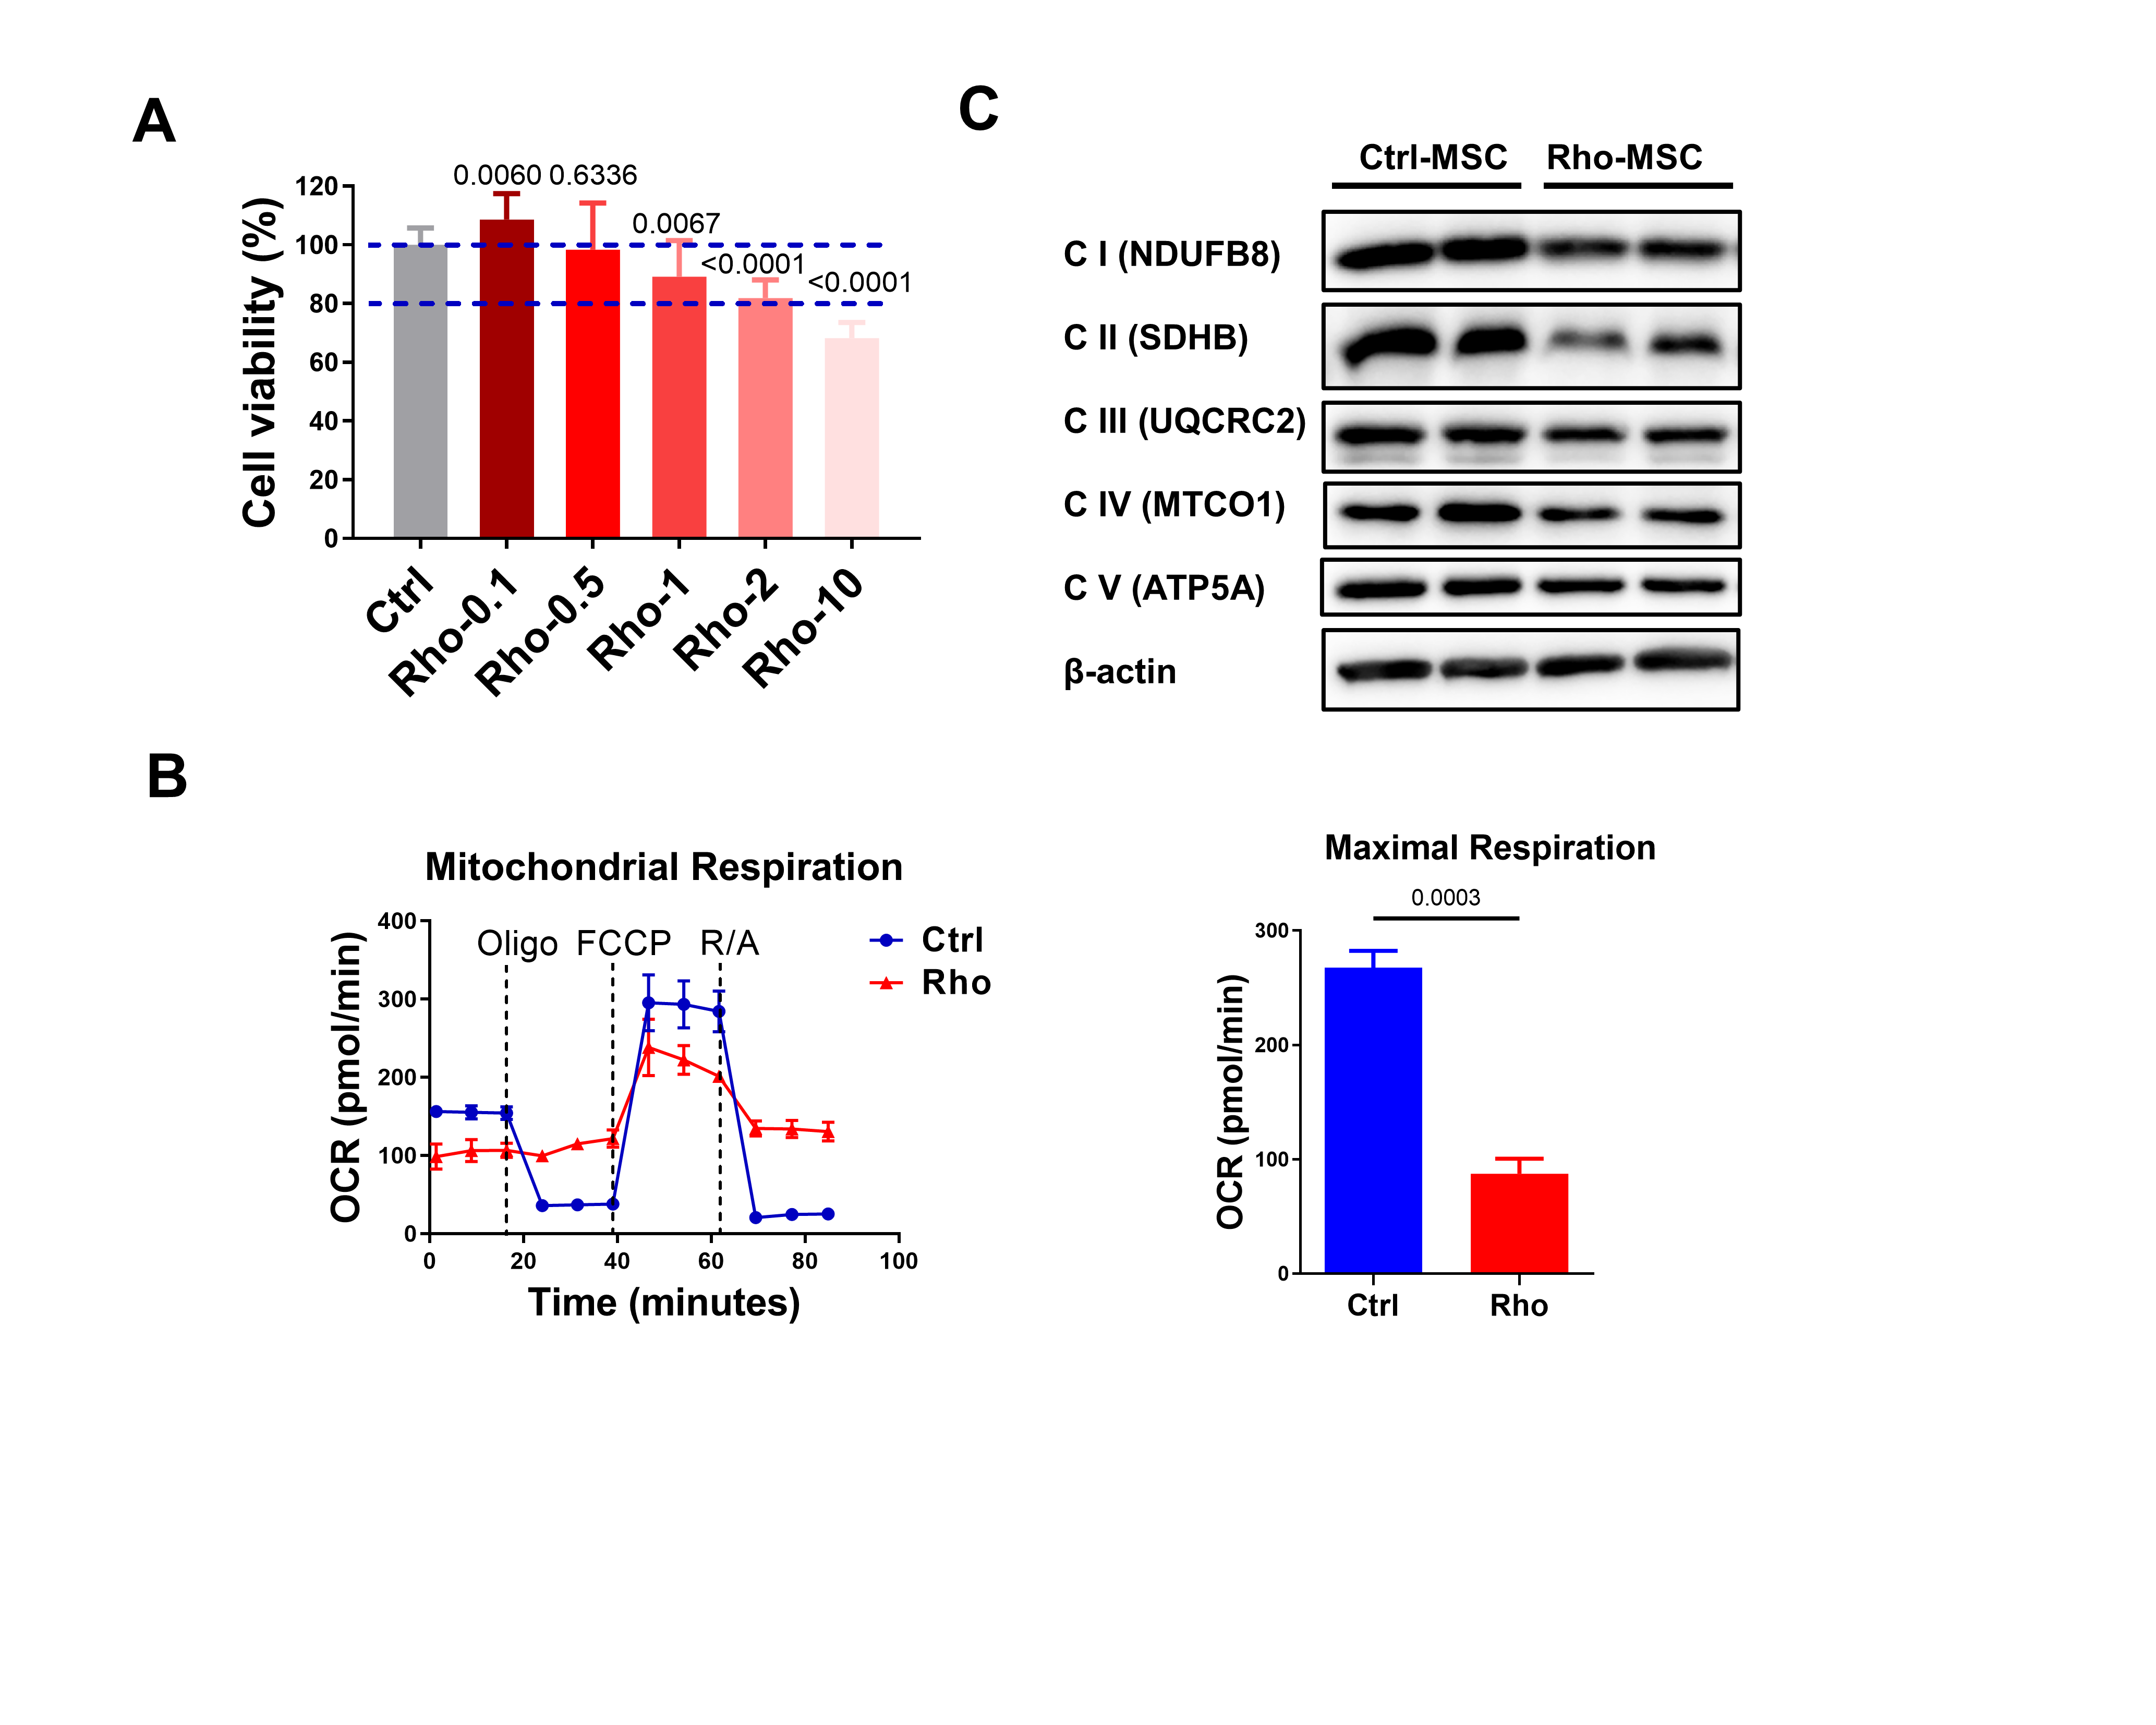


Figure S3A Cell viability of MSCs detected by the CCK-8 assay.

Figure S3B Measurement of the OCR in MSCs.

Figure S3C Western blot analysis of mitochondrial electron transport chain proteins in MSCs.

**Abbreviations:** MSCs, mesenchymal stem cells; Ctrl, control; Rho, rhodamine-6G.

**Table S1 Primer sequences used in RT-qPCR analysis for human and mouse, respectively.**

| **Gene** | **Forward Primer** | **Reverse Primer** |
| --- | --- | --- |
| *CD69(h)*  *CD25(h)*  *IFN-γ(h)*  *TNF-α(h)*  *IL-2(h)*  *HK2(h)* | ATTGTCCAGGCCAATACACATT  GTGGGGACTGCTCACGTTC  TCGGTAACTGACTTGAATGTCCA  GAGGCCAAGCCCTGGTATG  TCCTGTCTTGCATTGCACTAAG  GAGCCACCACTCACCCTACT | CCTCTCTACCTGCGTATCGTTTT  CCCGCTTTTTATTCTGCGGAA  TCGCTTCCCTGTTTTAGCTGC  CGGGCCGATTGATCTCAGC  CATCCTGGTGAGTTTGGGATTC  CCAGGCATTCGGCAATGTG |
| *GLUT1(h)*  *PFKFB3(h)*  *LDHA(h)*  *β-actin(h)* | TCTGGCATCAACGCTGTCTTC  ATTGCGGTTTTCGATGCCAC  ATGGCAACTCTAAAGGATCAGC  CTTCGCGGGCGACGAT | CGATACCGGAGCCAATGGT  GCCACAACTGTAGGGTCGT  CCAACCCCAACAACTGTAATCT  CCACATAGGAATCCTTCTGACC |
| *IFN-γ(m)*  *TNF-α(m)*  *IL-2(m)*  *IL-6(m)*  *HK2(m)* | ATGAACGCTACACACTGCATC  TAGCCCACGTCGTAGCAAAC  TCTGCGGCATGTTCTGGATTT  CTGCAAGAGACTTCCATCCAG  TGATCGCCTGCTTATTCACGG | CCATCCTTTTGCCAGTTCCTC  TGTCTTTGAGATCCATGCCGT  ATGTGTTGTCAGAGCCCTTTAG  AGTGGTATAGACAGGTCTGTTGG  AACCGCCTAGAAATCTCCAGA |
| *GLUT1(m)*  *PFKFB3(m)*  *LDHA(m)*  *β-actin(m)* | CCATCCCATCCACCACACTC  GAGATCGATGCTGGTGTGTG  CAAAGACTACTGTGTAACTGCGA  GTGACGTTGACATCCGTAAAGA | GCCGACAGAGAAGGAACCAA  CCCGTGGGATAGCGATAGTA  TGGACTGTACTTGACAATGTTGG  GCCGGACTCATCGTACTCC |
